# Supplementary material for: Urine Organic Acids as Metabolic Indicators for Global Developmental Delay/Intellectual Disability in Chinese Children
Source: Front Mol Biosci. 2021 Dec 22;8:792319. doi: 10.3389/fmolb.2021.792319 (PMC8757376; doi:10.3389/fmolb.2021.792319)
Supplement: Supplementary file 1 [file Table2.XLSX]

## Sheet: Sheet1
GDD vs TD group	Names of differential metabolites	matching compound name	HMBD	Pubcam	KEEG	VIP	P-VALUE	Q-VALUE	ID vs TD group	Names of differential metabolites	matching compound name	HMBD	Pubcam	KEEG	VIP	P-VALUE	Q-VALUE
	Methyl citric acid-4 (1)	2-Methylcitric acid	HMDB0000379	515	Not Available	1.76088	1.64988e-93	3.41624e-93		Methyl citric acid-4 (2)	2-Methylcitric acid	HMDB0000379	515	Not Available	1.59434	3.50952e-63	1.63382e-62
	Methyl citric acid-4 (2)	2-Methylcitric acid	HMDB0000379	515	Not Available	1.75968	1.42496e-93	3.41624e-93		Methyl citric acid-4 (1)	2-Methylcitric acid	HMDB0000379	515	Not Available	1.59157	5.01196e-54	1.16664e-53
	Malic acid - 3	Malic acid	HMDB0000156	222656	C00149	1.50778	2.32109e-77	1.37316e-77		Malic acid - 3	Malic acid	HMDB0000156	222656	C00149	1.48157	1.37643e-53	2.13595e-53
	2-Ketoglutaric acid - ox-2 (2)	2-Ketoglutaric acid	HMDB0000208	51	C00026	1.49149	7.83349e-31	9.01114e-32		Whey acid - 3	orotic acid	HMDB0000226	967	C00295	1.47924	2.273e-50	1.76362e-50
	2-ketone - isocaproic acid - ox-2	Ketoleucine	HMDB0000695	70	C00233	1.47682	5.88399e-89	8.12227e-89		Glycolic acid - 2	Glycolic acid	HMDB0000115	757	C03547	1.47721	2.34764e-36	6.42894e-37
	2-deoxy-4-hydroxyacetoacetic acid	Acetoacetic acid	HMDB0000060	96	C00164	1.4719	4.2597e-60	1.26002e-60		2-deoxy-4-hydroxyacetoacetic acid	Acetoacetic acid	HMDB0000060	96	C00164	1.44101	3.26029e-31	7.58898e-32
	Whey acid - 3	orotic acid	HMDB0000226	967	C00295	1.42691	7.88898e-87	8.16747e-87		Octenedioic acid -2	2-Octenedioic acid	HMDB0000341	6079438	Not Available	1.42971	9.45599e-52	1.10054e-51
	2-hydroxyadipate -3	2-hydroxyadipate	HMDB0000321	193530	C02360	1.42565	1.07185e-78	7.39792e-79		Palmitic acid - 1	Palmitic acid	HMDB0000220	985	C00249	1.42953	3.11081e-42	1.31655e-42
	3-hydroxy octanoic acid -3	3-hydroxy octanoic acid	HMDB0000325	22328017	Not Available	1.40213	2.37809e-75	1.23102e-75		Uracil - 2	Uracil	HMDB0000300	1174	C00106	1.41981	1.53193e-40	5.48596e-41
	Uracil - 2	Uracil	HMDB0000300	1174	C00106	1.40035	1.11573e-70	3.85039e-71		N-acetyl-aspartic acid -2	N-Acetyl-L-aspartic acid	HMDB0000812	65065	C01042	1.40951	1.72278e-44	8.9114e-45
	3-hydroxyisobutyric acid -2	(R)-3-Hydroxyisobutyric acid	HMDB0000336	11217234	Not Available	1.39759	1.23175e-49	2.3186e-50		2- hydroxyl phthalate -3	Sebacic acid	HMDB0000792	5192	C08277	1.40903	7.10983e-50	4.72845e-50
	2-hydroxyadipate -3	2-hydroxyadipate	HMDB0000321	193530	C02360	1.37502	1.56828e-74	7.21621e-75		2-Ketoglutaric acid - ox-2 (2)	2-Ketoglutaric acid	HMDB0000208	51	C00026	1.36398	2.05916e-51	1.91724e-51
	Octenedioic acid -2	2-Octenedioic acid	HMDB0000341	6079438	Not Available	1.33647	8.77615e-72	3.30398e-72		2-hydroxyadipate -3	2-hydroxyadipate	HMDB0000321	193530	C02360	1.35752	1.24306e-43	5.78697e-44
	N-acetyl-aspartic acid -2	N-Acetyl-L-aspartic acid	HMDB0000812	65065	C01042	1.33432	5.57397e-74	2.30829e-74		3-hydroxy octanoic acid -3	3-hydroxy octanoic acid	HMDB0000325	22328017	Not Available	1.34157	2.13854e-48	1.24447e-48
	Glycolic acid - 2	Glycolic acid	HMDB0000115	757	C03547	1.30289	9.76974e-54	2.12939e-54		2-ketone - isocaproic acid - ox-2	Ketoleucine	HMDB0000695	70	C00233	1.3358	5.7276e-17	8.08009e-18
	3-hydroxypropionic acid-2	Hydroxypropionic acid	HMDB0000700	68152	C01013	1.28814	3.06359e-59	8.45796e-60		3-hydroxypropionic acid-2	Hydroxypropionic acid	HMDB0000700	68152	C01013	1.32199	6.78852e-29	1.43651e-29
	Isocotonic acid -4	Isocitric acid	HMDB0000193	1198	C00311	1.28767	5.30015e-84	4.3898e-84		3-hydroxyisobutyric acid -2	(R)-3-Hydroxyisobutyric acid	HMDB0000336	11217234	Not Available	1.28309	4.39182e-25	7.86373e-26
	Palmitic acid - 1	Palmitic acid	HMDB0000220	985	C00249	1.23878	1.88981e-41	2.69865e-42		Pimelic acid - 2	Pimelic acid	HMDB0000857	385	C02656	1.26329	8.86305e-34	2.17164e-34
	Pimelic acid - 2	Pimelic acid	HMDB0000857	385	C02656	1.22595	3.2382e-55	7.45003e-56		3- hydroxy quinodioic acid -3	Sebacic acid	HMDB0000792	5192	C08277	1.23535	2.68674e-37	8.19726e-38
	3-hydroxyglutaric acid -3	3-Hydroxyglutaric acid	HMDB0000428	181976	Not Available	1.21043	4.36027e-70	1.38898e-70		3, 6-epoxy-dodecanedioid-2	Dodecanedioic acid	HMDB0000623	12736	C02678	1.21691	8.95513e-38	2.97784e-38
	3, 6-epoxy-dodecanedioid-2	Dodecanedioic acid	HMDB0000623	12736	C02678	1.16829	2.21089e-51	4.35988e-52		Isocotonic acid -4	Isocitric acid	HMDB0000193	1198	C00311	1.16898	1.42075e-28	2.87572e-29
	3- hydroxy quinodioic acid -3	Sebacic acid	HMDB0000792	5192	C08277	1.14881	2.17491e-56	5.29808e-57		mesaconic acid-2	Mesaconic acid	HMDB0000749	638129	C01732	1.14028	3.93093e-41	1.52501e-41
	Phosphate - 3	Phosphate	HMDB0001429	1004	C00009	1.02416	2.74858e-44	4.37786e-45		3-hydroxyglutaric acid -3	3-Hydroxyglutaric acid	HMDB0000428	181976	Not Available	1.12084	7.99384e-27	1.55061e-27
	Uric acid - 4	Uric acid	HMDB0000289	1175	C00366	1.0147	1.48374e-05	1.13786e-06		2-hydroxyglutaric acid -3	D-2-Hydroxyglutaric acid/L-2-Hydroxyglutaric acid	HMDB0000606/HMDB0000694	439391/439939	010/03	1.06454	3.74194e-37	1.08876e-37
										5- hydroxy-methyl - 2-furfuric acid -1	2-Furoic acid	HMDB0000617	6919	C01546	1.0153	3.21896e-09	3.42331e-10
